RESEARCH ARTICLE

# Meta-Analysis of the Association between Tea Intake and the Risk of Cognitive Disorders

Qing-Ping Ma, Chen Huang, Qiao-Yun Cui, Ding-Jun Yang, Kang Sun, Xuan Chen\*, Xing-Hui Li\*

Tea Research Institute, College of Horticulture, Nanjing Agricultural University, Nanjing, Jiangsu Province, China

\* [LXH@njau.edu.cn](mailto:LXH@njau.edu.cn) (XHL); [chenxuan@njau.edu.cn](mailto:chenxuan@njau.edu.cn) (XC)

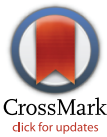

**OPEN ACCESS**

**Citation:** Ma Q-P, Huang C, Cui Q-Y, Yang D-J, Sun K, Chen X, et al. (2016) Meta-Analysis of the Association between Tea Intake and the Risk of Cognitive Disorders. *PLoS ONE* 11(11): e0165861. doi:10.1371/journal.pone.0165861

**Editor:** Kewei Chen, Banner Alzheimer's Institute, UNITED STATES

**Received:** May 26, 2016

**Accepted:** October 19, 2016

**Published:** November 8, 2016

**Copyright:** © 2016 Ma et al. This is an open access article distributed under the terms of the [Creative Commons Attribution License](https://creativecommons.org/licenses/by/4.0/), which permits unrestricted use, distribution, and reproduction in any medium, provided the original author and source are credited.

**Data Availability Statement:** This is a meta-analysis of previously published data. All the collected information are listed in the [Table 1](#) of the present meta-analysis.

**Funding:** This research was supported by the Earmarked Fund for Modern Agro-industry Technology Research System (CARS-23), the National Natural Science Foundation of China (31470690, 31570689) and the Priority Academic Program Development of Jiangsu Higher Education Institutions. The funders had no role in study design, data collection and analysis, decision to publish, or preparation of the manuscript.

## Abstract

### Background

Alzheimer's disease is a common neurodegenerative disorder in elderly. This study was aimed to systematically evaluate the association between tea intake and the risk of cognitive disorders by meta-analysis.

### Methods and Findings

PubMed, Embase and Wanfang databases were systematically searched and a total of 26 observational studies were included in this study. Odds ratios (ORs) and the corresponding 95% confidence intervals (CIs) were calculated and pooled by using fixed or random effects models according to the degree of heterogeneity.

### Results

The overall pooled analysis indicated that tea intake could significantly reduce the risk of cognitive disorders (OR = 0.65, 95%CI = 0.58–0.73). Subgroup analyses were conducted based on study design, population, frequency of tea drinking and type of cognitive disorders. The results showed that tea drinking was significantly associated with the reduced incidence of cognitive disorders in all of subgroups based on study design and frequency of tea drinking. In particular, tea drinking was inversely associated with the risk of cognitive impairment (CoI), mild cognitive impairment (MCI), cognitive decline and ungrouped cognitive disorders. Moreover, for population subgroups, the significant association was only found in Chinese people.

### Conclusion

Our study suggests that daily tea drinking is associated with decreased risk of CoI, MCI and cognitive decline in the elderly. However, the association between tea intake and Alzheimer's disease remains elusive.

**Competing Interests:** The authors have declared that no competing interests exist.

## Introduction

Cognitive disorders are a category of mental disease that affects memory, language, learning and problem solving. Alzheimer's disease (AD) and cognitive impairment (CoI) are two common cognitive disorders in elderly and negatively affect the elders' life. Cognitive disorders are caused by a complex of genetics and environmental factors [1,2]. Because of limited treatment of cognitive disorders, the prevention or onset delay of the disease through modification of risk factors such as lifestyles are proposed [3,4]. Some lifestyles, such as folic acid supplementation [5], flavonoid-rich food [6] and caffeine contained drinks [7] have been reported to be inversely associated with the risk of cognitive disorders.

Tea, a flavonoid-rich and caffeine contained drink, is popular worldwide. Recent studies proposed that drinking tea may reduce the risk of AD and CoI [8]. Kuriyama et al. [9] stated that the higher green tea consumption was associated with the lower prevalence of CoI in humans. Ide et al. [10] also found that the green tea intake could improve the cognitive function or delay the progression of cognitive dysfunction in elders. However, some other researchers presented the opposite results showing no obvious association between tea drinking and cognitive disorders [11,12].

Several systematic review or meta-analyses on this issue have been reported. However, these analyses only examined the effect of one major component in tea such as caffeine [13] or flavonoids [14], and some other caffeine contained food or drinks like coffee were also considered in these analyses.

In this study, we performed a new meta-analysis to specifically and systematically evaluate the association between tea drinking and the incidence of cognitive disorders such as AD and CoI by using pooled analysis of the published observational studies. Since China has the most tea drinkers in the world, the related Chinese reports were included in our meta-analysis.

## Materials and Methods

### Literature search

We searched PubMed (<http://www.ncbi.nlm.nih.gov/pubmed/>), Embase (<https://www.embase.com/>) and Chinese Wanfang database (<http://www.wanfangdata.com.cn/>) up to September, 2015 using the search terms of "tea AND (Alzheimer disease OR dementia OR cognitive\*)" in English and Chinese. We also searched the references from the included studies and relevant reviews to identify additional publications. The study selection process was performed following the PRISMA (Preferred Reporting Items for Systematic Review and Meta-Analyses) statement [15]. The PRISMA checklist for this meta-analysis was shown in [S1 File](#).

### Selection criteria

We selected the studies which conformed with the following criteria: 1) only observational studies with case-control, cohort and cross-sectional design were considered due to the lack of relevant double-blind placebo controlled trials; 2) the study reported the relationship between tea consumption and cognitive disorders such as AD, cognitive decline and CoI in elderly; 3) the study provided the data for calculating the estimates of odds ratio (OR) and the corresponding 95% confidence interval (CI).

The animal studies, reviews, reports and studies with unavailable data were excluded. If two or more studies shared the same population, we only selected the latest one. Two of us (Ma and Huang) completed the literature search process independently and the disagreements were resolved by discussion.

## Data extraction and quality assessment

Huang and Cui independently extracted the main information of the included studies using the predesigned form and assessed the methodological quality of the case-control and cohort studies using the Newcastle-Ottawa Scale (NOS) [16]. The NOS contained 3 aspects with 8 items: selection of the participants (4 items), comparability of the cohorts/cases and controls (1 item) and the exposure/outcomes (3 items). The total score was 9 stars with 1 star for each item and 2 stars for the item of comparability. In this study, 7, 4–6 and < 4 stars were considered as high, moderate and low quality, respectively. The discrepancies were discussed with the third reviewer (Yang).

## Statistical analysis

We pooled the odds ratio (OR) and the corresponding 95% confidence interval (CI) using fixed or random effects models according to the degree of heterogeneity. The heterogeneity was assessed by  $I^2$  statistic, which measures the extent of true heterogeneity dividing the difference between the result of the  $Q$  test and its degrees of freedom ( $k-1$ ) by the  $Q$  value itself, and multiplied by 100 [17].  $I^2 > 50\%$  was considered as heterogeneity and the pooled analysis was conducted using a random effects model. Otherwise, the fixed effect model was used. We conducted the subgroup analysis according to study design, population, drink frequency and type of cognitive disorder. For drink frequency, the studies without description of the drink frequency were classified into “ungrouped subgroup”. These analyses were conducted using Stata 13 software. In addition, publication bias was assessed using Begg’s and Egger’s test.

## Results

### Study selection

The study selection process was shown in Fig 1. Our initial search resulted in retrieval of 1 528 articles (397 from PubMed, 1 027 from Embase and 104 from Wanfang). Firstly, we took out 1 090 duplicate records by preliminary screening. Secondly, 370 animal studies or reviews which obviously deviated from inclusion criteria were removed by reading titles and abstracts. Thirdly, we removed 42 articles after reviewing the full-texts and the reasons for exclusion were listed in S2 File. Finally, 26 studies were included in this meta-analysis [6,9,11,12,18–39].

### Study characteristics

Table 1 summarized the characteristics of the 26 selected studies including 10 case-control studies, 4 cohorts and 12 cross-sectional studies. These studies contained 52 503 participants distributed in Asia, Europe, Australia and America. All of the participants were 50 years and older. For diagnosis of the study outcomes, Diagnostic and Statistical Manual of Mental Disorders-IV (DSM-IV) was used for dementia diagnosis, National Institute of Neurological and Communicative Diseases and Stroke/Alzheimer’s Disease and Related Disorders Association (NINCDS-ADRDA) for AD diagnosis and Mini-Mental State Examination (MMSE) for CoI diagnosis. Cognitive impairment contains all the patients falling in between healthy and demented states in these included studies. Mild cognitive impairment (MCI) was defined as an early state of cognitive impairment in the included studies. In addition, cognitive decline was defined as a drop of  $\geq 1-2$  MMSE scores from the baseline. Some other auxiliary criteria such as Montreal Cognitive Assessment (MoCA), Mini-Cog and Petersen’s criteria were also used in combination for diagnosis of these cognitive disorders (Table 1).

Table 2 showed the quality assessment of the included case-control studies and cohorts. The studies were awarded relatively high quality.

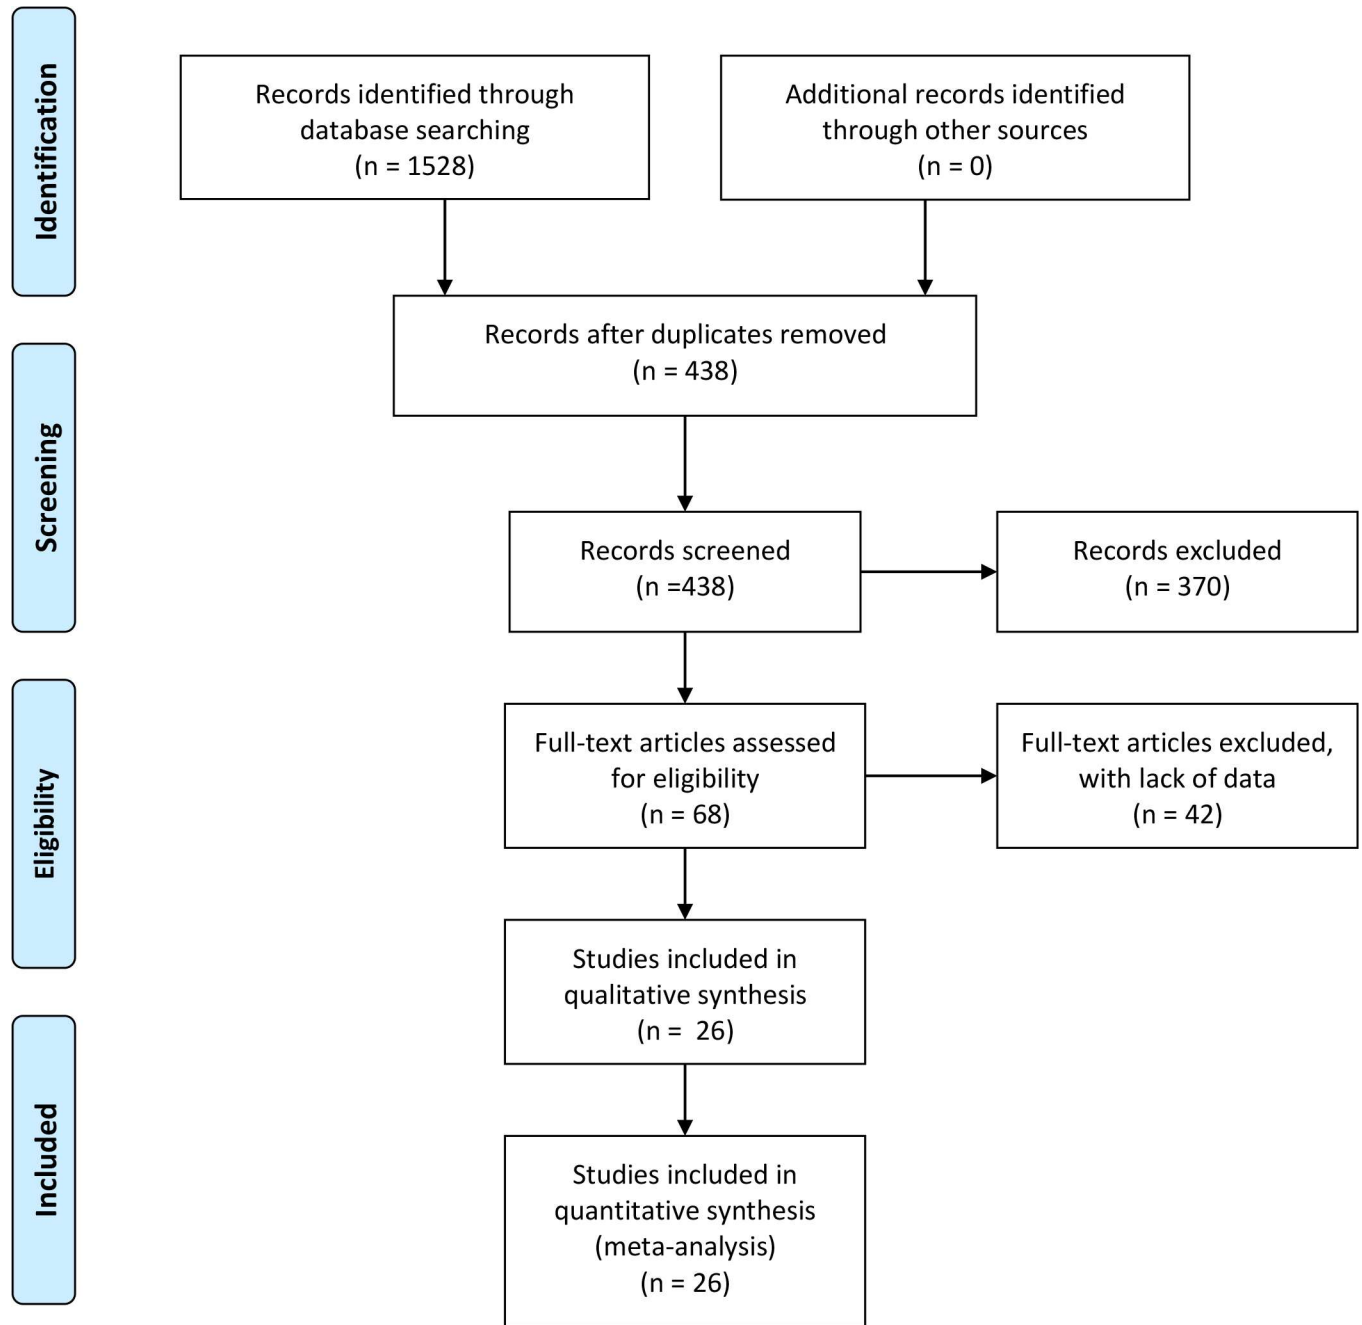

**Fig 1. Study selection process for this meta-analysis.**

doi:10.1371/journal.pone.0165861.g001

### Association of tea intake and the risk of cognitive disorders

As shown in Fig 2, a significant heterogeneity ( $I^2 = 78.8\%$ ) was found. Thus, a random effects model was used in this meta-analysis. The forest plot showed that tea drinking was inversely associated with the risk of cognitive disorders (OR = 0.65, 95%CI = 0.58–0.73).

**Table 1. Characteristics of the included studies in this meta-analysis.**

| Study               | Population                                          | Study design                          | n (male/female)     | mean consumption                                            | Assessment of cognitive status                                                                                           | Cognitive results                                                                                                            | Adjust factors                                                                                                                                                                                                                                                                                                                                                                                                                                               |
|---------------------|-----------------------------------------------------|---------------------------------------|---------------------|-------------------------------------------------------------|--------------------------------------------------------------------------------------------------------------------------|------------------------------------------------------------------------------------------------------------------------------|--------------------------------------------------------------------------------------------------------------------------------------------------------------------------------------------------------------------------------------------------------------------------------------------------------------------------------------------------------------------------------------------------------------------------------------------------------------|
| Broe 1990 [32]      | Australian (52–96)                                  | hospital based case-control           | 340 (170/170)       | drinking vs. never; >4cups/d vs. <4cups/d                   | Neurology of Aging Schedule, MMSE, comprehensive neuropsychological assessment, NINCDS-ADRDA for probable or possible AD | drinking in cases 162, drinking in controls 166; >4cups/d in cases: 73, in control 58; never drink in cases 8, in controls 4 | Age, sex and, where possible, the general practice of origin.                                                                                                                                                                                                                                                                                                                                                                                                |
| Chen 2012 [18]      | Chinese (≥65)                                       | prospective nested case-control study | 5,691 (1,389/4,302) | tea drinking vs. not drinking                               | MMSE-r less than 18 for cognitive decline                                                                                | OR = 0.82 (0.68, 1.00)                                                                                                       | NA                                                                                                                                                                                                                                                                                                                                                                                                                                                           |
| Cheng 2014 [19]     | Chinese (>60)                                       | cross-sectional                       | 3,885 (2,379/1,506) | tea drinking vs. not drinking                               | DSM-IV, and clinical evaluation for dementia; HDS and CMS for Col                                                        | 484 CI patients in 1927 non tea drinkers, 437 CI patients in 1958 tea drinkers                                               | NA                                                                                                                                                                                                                                                                                                                                                                                                                                                           |
| Dai 2006 [35]       | Japanese Americans in King County, Washington (≥65) | cohort with mean 6.4 y follow up      | 1589 (725/864)      | 1–2 times/wk, 3 or more times/wk vs. less often than weekly | NINCDS-ADRDA for AD                                                                                                      | 1–2 times per week HR = 1.49 (0.43–5.16); 3 times or more per week 1.70 (0.67–4.33); Less Often Than Weekly 1.00             | Years of education, gender, regular physical activity, body mass index, baseline CASI score, olfaction diagnostic group, total energy intake, intake of saturated, monounsaturated, and polyunsaturated fatty acids, ApoE genotype, smoking status, alcohol drinking, supplementation of vitamin C, vitamin E, and multivitamin, and tea drinking, and fruit and vegetable juice drinking, dietary intake of vitamin C, vitamin E, and <i>Beta</i> -carotene |
| Ding 2012 [20]      | Chinese (>60)                                       | case-control                          | 3,141 (1,438/1,703) | ≥3 d/wk vs. not drinking                                    | C-MMSE and AVLT for Col                                                                                                  | OR = 0.36 (0.17, 0.75) for AD<br>OR = 0.74 (0.56, 0.98) for MCI                                                              | Sex, age, education, marriage, BMI, ApoE 4, family economic status in childhood, experience significant adverse events, smoking, drinking, doing physical job before retire, have physical training habit, have many sisters and brothers, family history of dementia, history of hypertension, diabetes, coronary heart disease, stroke and hyperlipidemia                                                                                                  |
| Eskelinen 2009 [38] | Finland (50.4 ±6.0 for women and 71.3±4.0 for men)  | cross-sectional                       | 1,409 (543/875)     | ≥1 cup/day vs. not drinking                                 | MMSE≤24 and DSM-IV for dementia; MMSE≤24 and NINCDS-ADRDA for AD                                                         | OR = 1.04 (0.59, 1.84) for dementia, OR = 0.91 (0.48, 1.71) for AD, and OR = 1.27 (0.84, 1.91) for all the demented).        | Midlife smoking, SBP, serum total cholesterol, BMI, and physical activity.                                                                                                                                                                                                                                                                                                                                                                                   |

(Continued)

Table 1. (Continued)

| Study             | Population                                                  | Study design                | n (male/female)     | mean consumption                                                | Assessment of cognitive status                                                         | Cognitive results                                                                                                                                                                                                                                                | Adjust factors                                                                                                                                                                                                                                                            |
|-------------------|-------------------------------------------------------------|-----------------------------|---------------------|-----------------------------------------------------------------|----------------------------------------------------------------------------------------|------------------------------------------------------------------------------------------------------------------------------------------------------------------------------------------------------------------------------------------------------------------|---------------------------------------------------------------------------------------------------------------------------------------------------------------------------------------------------------------------------------------------------------------------------|
| Forster 1995 [11] | English ( $\geq 65$ with mean onset age of $55.9 \pm 3.9$ ) | case-control                | 218                 | >4 cups/d of tea vs. not drinking                               | NINCDS-ADRDA criteria for AD, DSM-III-R criteria for dementia, MMSE for Col            | OR = 1.40 (0.81, 1.63)                                                                                                                                                                                                                                           | NA                                                                                                                                                                                                                                                                        |
| Guo 2011 [21]     | Chinese ( $\geq 65$ )                                       | hospital based case-control | 214 (105/109)       | tea drinking vs. not drinking                                   | AD diagnosis: C-MMSE, MoCA <24; CDR >1; HIS $\leq 4$ ; FAQ $\geq 5$ ; and NINCDS-ADRDA | controls: 93 tea drinkers (17 <4times/wk and 76 >4times/wk) and 58 never drink; AD cases: 33 tea drinkers (15 <4 times/wk and 18 >4 times/wk) and 30 never drink                                                                                                 | NA                                                                                                                                                                                                                                                                        |
| Huang 2009 [48]   | Chinese (90–108)                                            | cross-sectional             | 681 (223/458)       | drinking former vs. not drinking                                | MMSE <24 for Col                                                                       | men: OR = 0.917 (0.344, 2.449); women: OR = 0.862 (0.265, 0.907)                                                                                                                                                                                                 | Age, sex, sleep habits, educational levels, religion habits, and temperament.                                                                                                                                                                                             |
| Kuriyama 2006 [9] | Japanese ( $\geq 70$ )                                      | cross-sectional             | 1,003               | 3 cups/wk vs. 4–6 cups/wk or 1 cup/d, and 2 cups/d (100 mL/cup) | MMSE $\leq 26$ for Col                                                                 | For green tea consumption, the OR = 1.00 (reference) for <3 cups/wk, 0.62 (0.33, 1.19) for 4–6 cups/wk or 1 cup/d, and 0.46 (0.30, 0.72) for 2 cups/d. Corresponding ORs were 1.00 (reference), 0.60 (0.35, 1.02), and 0.87 (0.55, 1.38) for black or oolong tea | NA                                                                                                                                                                                                                                                                        |
| Lian 2013 [22]    | Chinese ( $\geq 60$ )                                       | case-control                | 240 (104/136)       | drinking everyday vs. not drinking                              | C-MMSE and DSM-IV for MCI                                                              | OR = 0.73 (0.47, 1.13)                                                                                                                                                                                                                                           | NA                                                                                                                                                                                                                                                                        |
| Lindsay 2002 [12] | Canadian ( $\geq 65$ )                                      | cohort with 5y follow up    | 4,088 (1,718/2,370) | tea drinking vs. not drinking                                   | mMMSE <78/100 and clinical evaluation for AD                                           | OR = 1.12(0.78, 1.61)                                                                                                                                                                                                                                            | Age, sex, and education.                                                                                                                                                                                                                                                  |
| Luo 2015 [23]     | Chinese ( $\geq 65$ )                                       | case-control                | 1,981 (817/1,168)   | tea drinking vs. not drinking                                   | Petersen's criteria for MCI                                                            | 102 MCI patients in 932 tea drinkers and 197 patients in 1049 non-drinkers                                                                                                                                                                                       | NA                                                                                                                                                                                                                                                                        |
| Ng 2008 [24]      | Chinese living in Singapore ( $\geq 55$ )                   | cross-sectional             | 2,194               | drinking tea with low, medium and high levels vs. not drinking  | MMSE $\leq 23$ as Col, a drop in MMSE score of $\geq 1$ point as cognitive decline     | For Col: Low intake 0.56 (0.40, 0.78), Medium 0.45 (0.27, 0.72), high 0.37 (0.14, 0.98); for cognitive decline: Low intake 0.74 (0.54, 1.00), Medium 0.78 (0.55, 1.11), High 0.57 (0.32, 1.03)                                                                   | Age, sex, education, smoking, alcohol consumption, BMI (continuous), hypertension, diabetes, heart disease, stroke, depression, APOE 4, physical activities, social and productive activities, vegetable and fruit consumption, fish consumption, and coffee consumption. |

(Continued)

Table 1. (Continued)

| Study                       | Population        | Study design                       | n (male/female)     | mean consumption                                                                                                   | Assessment of cognitive status                                   | Cognitive results                                                                                                                                                                                                                              | Adjust factors                                                                                                                                                                                                                                                                                                                                                                                                                                                                              |
|-----------------------------|-------------------|------------------------------------|---------------------|--------------------------------------------------------------------------------------------------------------------|------------------------------------------------------------------|------------------------------------------------------------------------------------------------------------------------------------------------------------------------------------------------------------------------------------------------|---------------------------------------------------------------------------------------------------------------------------------------------------------------------------------------------------------------------------------------------------------------------------------------------------------------------------------------------------------------------------------------------------------------------------------------------------------------------------------------------|
| Noguchi-Shinohara 2014 [25] | Japanese (≥60)    | cohort with mean follow up of 4.9y | 490                 | For green tea, drinking moderate and every day vs. not drinking; for black tea, drinking 1–7 d/wk vs. not drinking | MMSE <24 for Col                                                 | For dementia, the OR were 0.90 (0.34, 2.35) for 1–6 days/week and 0.26 (0.06, 1.06) for every day. For cognitive decline (MCI or dementia), the OR were 0.47 (0.25, 0.86) and 0.32 (0.16, 0.64) for 1–6 days/week and every day, respectively. | Age and sex, history of hypertension, diabetes mellitus, hyperlipidemia, education, ApoE E4 carrier status, alcohol drinking, smoking, physical activities and/or hobbies, and coffee and black tea consumption.                                                                                                                                                                                                                                                                            |
| Nurk 2009 [6]               | Norwegian (70–74) | cross-sectional                    | 2,031 (914/1,117)   | tea drinking vs. not drinking                                                                                      | mMMSE ≤10 for Col                                                | OR = 0.33 (0.16, 0.69)                                                                                                                                                                                                                         | All values are adjusted for sex, education, vitamin supplement use (multivitamins, folate, and vitamins B, C, D, or E), smoking status, history of CVD, diabetes, and total energy intake.                                                                                                                                                                                                                                                                                                  |
| Pan 2012 [26]               | Chinese (>60)     | cross-sectional                    | 897 (434/463)       | drinking occasionally, drinking often vs. not drinking                                                             | MoCA and MMSE for MCI                                            | OR = 0.751 (0.593, 0.951)                                                                                                                                                                                                                      | Age, education, sleep, social activity and study                                                                                                                                                                                                                                                                                                                                                                                                                                            |
| Shen 2015 [31]              | Chinese (≥60)     | cross-sectional                    | 9,375 (4,548/4,827) | <2 cups/d, 2–4 cups/d and ≥4 cups/d vs. not drinking (250 mL/cup)                                                  | C-MMSE for Col                                                   | compared with non-consumption participants, those who consumed < 2 cups/d, 2–4 cups/d, and ≥4 cups/d were observed ORs of 0.77 (0.56, 1.07), 0.62 (0.47, 0.81), and 0.49 (0.36, 0.66), respectively.                                           | Age, sex, race, education, marriage, tea concentration, tea categories, physical examinations (BMI, WHR, SBP, DBP), family status (family income, have children or not) and disease situation (history of present illness and family history of hypertension, diabetes, CHD, AD, PD), behavioral risk factors (cigarette smoking, alcohol consumption, and physical activities), dietary intake (vegetables, fruits, red meat, fish, beans, milk), nutrition supplement, depression and ADL |
| Song 2007 [27]              | Chinese (>60)     | cross-sectional                    | 3,047 (2,618/429)   | tea drinking vs. not drinking                                                                                      | CCMD2-R, DSM-IV and ICD-10 for dementia; MoCA and MMSE for MCI   | 371 MCI patients in 1788 tea drinkers and 350 patients in 1259 non-drinkers                                                                                                                                                                    | NA                                                                                                                                                                                                                                                                                                                                                                                                                                                                                          |
| Sun 2012 [33]               | Chinese (≥60)     | case-control                       | 168 (48/120)        |                                                                                                                    | C-MMSE for Col, clinical test, DSM-IV, ADL and CSDD for dementia | OR 0.778 (0.607, 0.996)                                                                                                                                                                                                                        | Hypertension, smoking, drinking, physical activity, live alone, insomnia, bland diet, high cholesterol, high blood glucose, uric acid, thin and fat                                                                                                                                                                                                                                                                                                                                         |

(Continued)



Table 1. (Continued)

| Study          | Population    | Study design                 | n (male/female)     | mean consumption                                           | Assessment of cognitive status                 | Cognitive results                                                                                                                                                                | Adjust factors                                                                                                                                                                                                                                                                  |
|----------------|---------------|------------------------------|---------------------|------------------------------------------------------------|------------------------------------------------|----------------------------------------------------------------------------------------------------------------------------------------------------------------------------------|---------------------------------------------------------------------------------------------------------------------------------------------------------------------------------------------------------------------------------------------------------------------------------|
| Wang 2012 [28] | Chinese (>60) | case-control                 | 174                 | drinking everyday, 1–4 d/wk, occasionally vs. not drinking | DSM-IV, NINCDS-ADRDA and clinical test for VD  | drinking occasionally OR = 0.52 (0.15, 1.82), 1–4d/wk OR = 0.41 (0.11, 1.57), everyday OR = 0.35 (0.18, 0.68)                                                                    | Economic income, hypertension, education and location                                                                                                                                                                                                                           |
| Wang 2014 [36] | Chinese (≥65) | cohort with 2 year follow up | 223 (70/153)        | drink sometimes, often vs. never drinking                  | A drop of ≥ 2 MMSE points as cognitive decline | 146 non cognitive decline: 30 never drink green tea, 19 drink sometimes and 97 drink often; 74 cognitive decline: 26 never drink green tea, 8 drink sometimes and 40 drink often | Age, non-Chinese speaking background and education, and a formal diagnosis of dementia                                                                                                                                                                                          |
| Wu 2011 [37]   | Chinese (≥65) | cross sectional              | 2,119 (1017/1102)   | < 1 time/wk, > 1 time/wk vs. not drinking                  | MMSE<24 for Col                                | less than once per week 1.14 (0.82–1.59) more than once per week 0.99 (0.75–1.3)                                                                                                 | Age, gender, education level, marital status, social support, hyperlipidemia, stroke, physical function, depressive symptoms, self-rated health, cigarette smoking, leisure-time, physical activity, fruits and vegetables consumption, coffee intake, multivitamin intake, BMI |
| Xu 2012 [29]   | Chinese (≥50) | cross-sectional              | 3,485 (1,126/2,359) | green tea drinking vs. not drinking                        | C-MMSE, CDT and Mini-Cog for Col               | OR = 0.56 (0.40, 0.79)                                                                                                                                                           | NA                                                                                                                                                                                                                                                                              |
| Yao 2010 [39]  | Chinese (≥60) | cross-sectional              | 2,809 (1,010/1,799) | tea drinking daily vs. not drinking                        | C-MMSE                                         | 64 Col patients in 1244 tea drinkers; 131 Col patients in 1503 non-tea drinkers                                                                                                  | NA                                                                                                                                                                                                                                                                              |
| Yin 2012 [30]  | Chinese (≥65) | cross-sectional              | 1,011 (410/601)     | tea drinking vs. not drinking                              | Petersen's criteria for MCI diagnosis          | 44 MCI patients in 687 tea drinkers and 23 patients in 324 non-drinkers                                                                                                          | NA                                                                                                                                                                                                                                                                              |

Notes: MMSE: Mini-Mental State Examination

C-MMSE (Chinese revised MMSE): ≤24 for people with more than 6 years education, ≤20 for people with 1–6 years of education, ≤17 for illiteracy mild cognitive impairment

HDS: Hasegawa Dementia Scale, HIS: Hachinski ischemia score, MoCA: montreal cognitive assessment scale, ADL: activities of daily living scale

CSDD: the Chinese version of the Cornell scale for depression in dementia, AVLT: Auditory verbal learning test, CMS: Clinical Memory Scale

doi:10.1371/journal.pone.0165861.t001

### Subgroup analyses

Based on the study design, we classified all studies into three subgroups: case-control, cohort and cross-sectional (Fig 3). Each of the three subgroups showed an inverse correlation between tea drinking and cognitive disorder. In population subgroups (Fig 4), tea drinking could significantly reduce the risk of cognitive disorders in Chinese (OR = 0.61, 95%CI = 0.54–0.69). However, no significant associations were found in European (OR = 0.98, 95%CI = 0.21–1.75) and Japanese populations (OR = 0.76, 95%CI = 0.39–1.13). In subgroups by drinking frequency



**Table 2. The quality assessment of the included studies.**

| Study                       | Selection | Comparability | Exposure/Outcome | Total |
|-----------------------------|-----------|---------------|------------------|-------|
| <b>Case-control studies</b> |           |               |                  |       |
| Broe 1990                   | ☆☆☆☆      | ☆             | ☆☆☆              | 8     |
| Chen 2012                   | ☆☆☆☆      | ☆             | ☆                | 6     |
| Ding                        | ☆☆☆       | ☆             | ☆☆               | 6     |
| Forster 1995                | ☆☆☆☆      | ☆             | ☆                | 6     |
| Guo 2011                    | ☆☆☆☆      | ☆☆            | ☆☆               | 8     |
| Lian 2013                   | ☆☆☆☆      | ☆☆            | ☆☆               | 8     |
| Lindsay 2002                | ☆☆☆       | ☆☆            | ☆☆               | 7     |
| Luo 2015                    | ☆☆☆☆      | ☆             | ☆☆               | 7     |
| Wang 2012                   | ☆☆☆☆      | ☆☆            | ☆☆               | 8     |
| Sun 2012                    | ☆☆☆☆      | ☆☆            | ☆                | 7     |
| <b>Cohort studies</b>       |           |               |                  |       |
| Dai 2006                    | ☆☆☆       | ☆☆            | ☆☆               | 7     |
| Ng 2008                     | ☆☆☆       | ☆☆            | ☆                | 6     |
| Noguchi-Shinohara 2014      | ☆☆☆☆      | ☆☆            | ☆☆               | 8     |
| Wang 2014                   | ☆☆☆☆      | ☆             | ☆☆               | 7     |

doi:10.1371/journal.pone.0165861.t002

(Fig 5), all of the tea drinkers showed significant lower risk of cognitive disorders compared to those not drinking or rare drinking. In subgroup analysis based on type of cognitive disorders (Fig 6), drinking tea could significantly lower the risk of CoI (OR = 0.52, 95%CI = 0.43–0.62), MCI (OR = 0.64, 95%CI = 0.52–0.76), cognitive decline (OR = 0.74, 95%CI = 0.58–0.90) and unclassified cognitive disorder (OR = 0.76, 95%CI = 0.60–0.91). However, no significant association was found between tea intake and dementia or AD (OR = 0.88, 95%CI = 0.65–1.12).

### Publication bias

Publication bias was assessed according to the overall pooled analysis. Begg’s test ( $P = 0.691$ ), Egger’s test ( $P = 0.707$ ) and the symmetrical funnel plot (Fig 7) indicated no publication bias in this meta-analysis.

### Discussion

In the current meta-analysis, we found that tea intake could significantly reduce the risk of cognitive disorders in elderly. Subgroup analyses showed similar results in subgroups. Our results were the opposite of a recent meta-analysis which found no association between caffeine from coffee or tea and cognitive disorders [13]. Caffeine is an important component in tea and coffee. Many experimental studies also showed the benefits of caffeine on cognitive function. For an instance, in aged mice with AD, caffeine could reverse CoI and decrease brain amyloid- $\beta$  levels [40]. But unlike coffee, there are so many other beneficial elements aside from caffeine in tea including the polyphenols which have antioxidant effect [41,42]. Accumulating evidence showed the neuroprotective activity of the main catechin (-)-epigallocatechin-3-gallate (EGCG) from tea [43]. Chronic green tea EGCG could improve learning and memory deficits in diabetic rats via retardation of oxidative stress and modulation of nitric oxide [44]. In Alzheimer transgenic mice, EGCG showed the protective effect through modulating cleavage of amyloid precursor protein and reducing cerebral amyloidosis [45]. As above, the cognition protective effect of tea may be owing to the catechin and caffeine components.

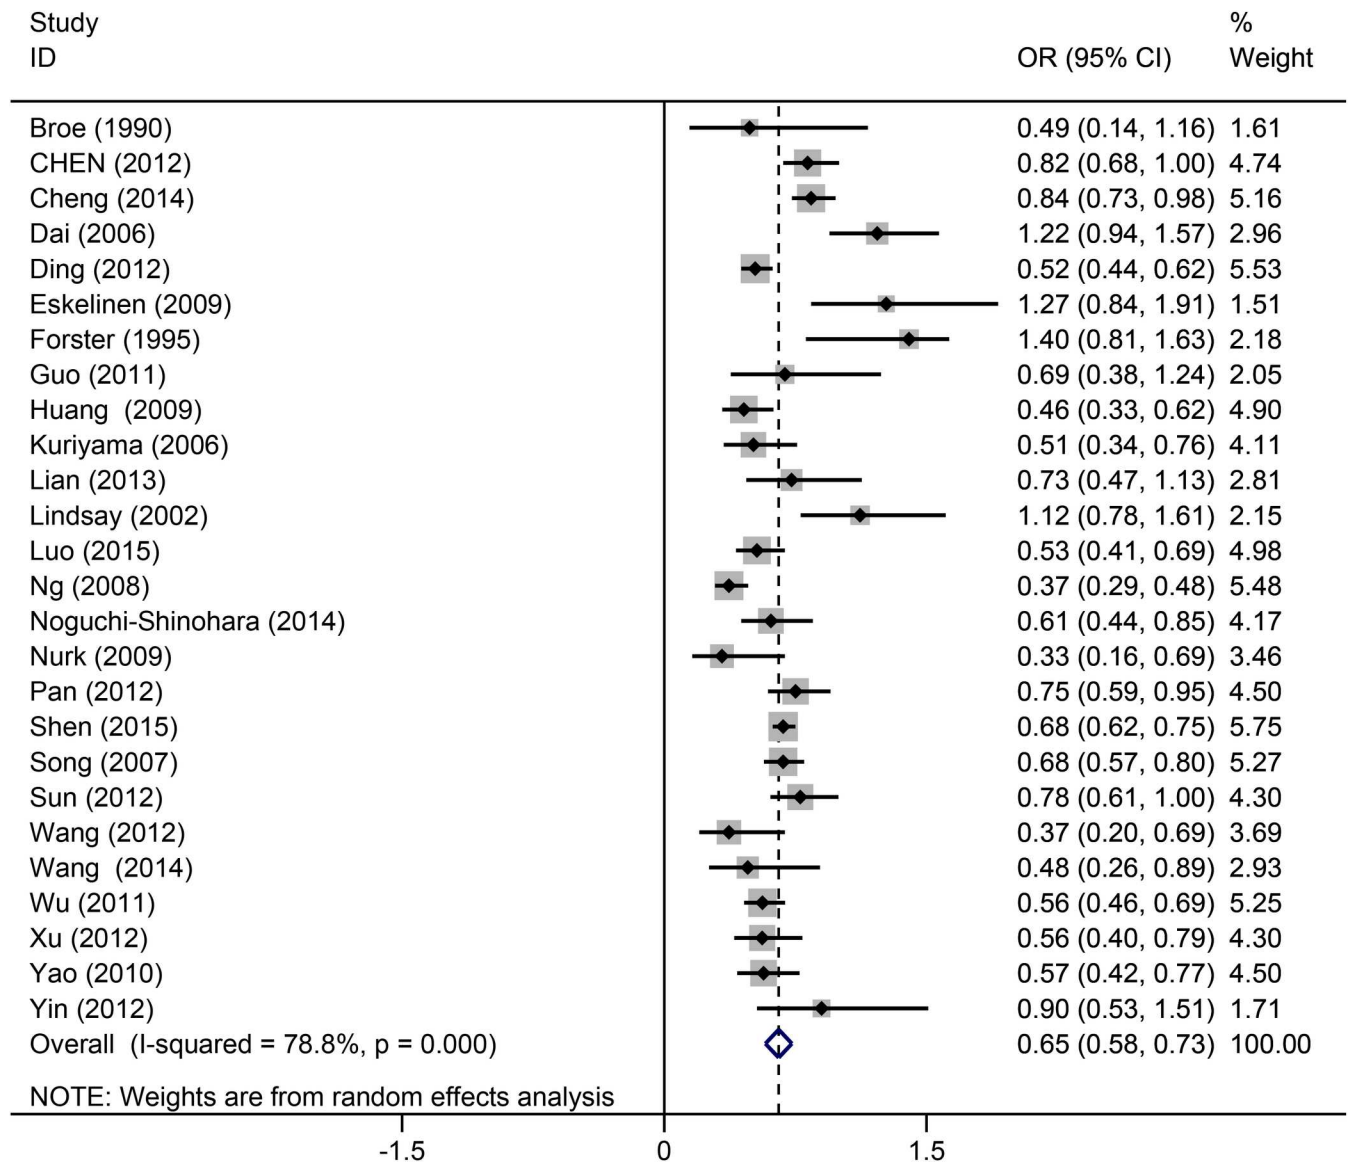

**Fig 2. Overall pooled analysis of association between tea intake and the cognitive disorders.**

doi:10.1371/journal.pone.0165861.g002

Tea has several subtypes based on the processing technology, such as green, black and oolong tea. These subtypes of tea have different content of catechins and caffeine. Among the tea types commonly consumed, the highest catechins and caffeine were found in green tea and black tea, respectively [46]. In the present meta-analysis, an included study [24] showed significant decrease of the CoI incidence in black and oolong tea drinkers (OR = 0.55, 95%CI = 0.40–0.76) and green tea drinkers (OR = 0.42, 95%CI = 0.25–0.69). Because the black and oolong tea were combined in one category, we were not sure if black tea has a different effect from green tea on preventing the progression of CoI. In another study [29], green tea drinking was also associated with reduced risk of CoI (OR = 0.56, 95%CI = 0.40–0.79). However, whether green tea is more beneficial cannot be certain due to lack of comparison with other types of tea. Therefore, tea types should be considered in future studies.

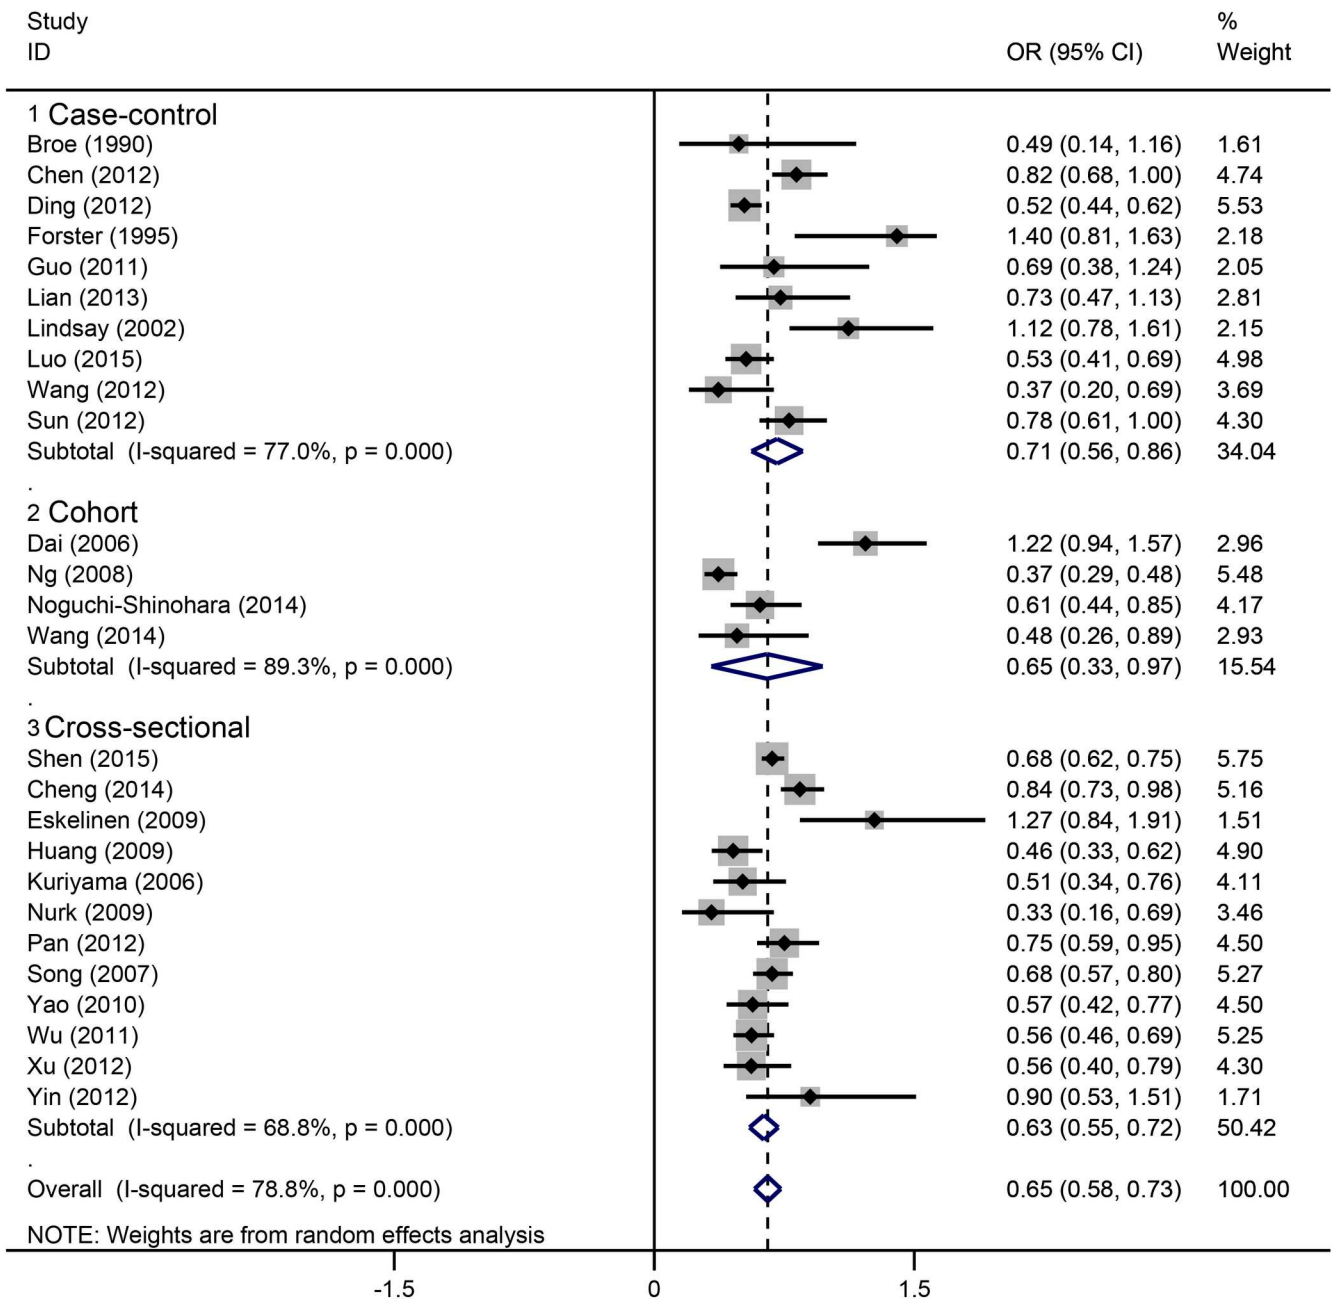

Fig 3. Subgroup analysis of association between tea intake and the cognitive disorders based on study design.

doi:10.1371/journal.pone.0165861.g003

In subgroup analysis, we found that tea intake could significantly reduce the risk of cognitive disorders in Chinese, but not in Japanese and Europeans. Because only one study each considered Australian [32] and Canadian patients [12], they were not included in subgroup analysis. Both two studies showed no significant association between tea intake and cognitive disorders (Fig 2). We think that the major reason is the different outcomes among the included studies. For the Chinese group, the major outcome was CoI or MCI. However, for European, Australian and Canadian groups, the major outcome was AD. This is consistent with the

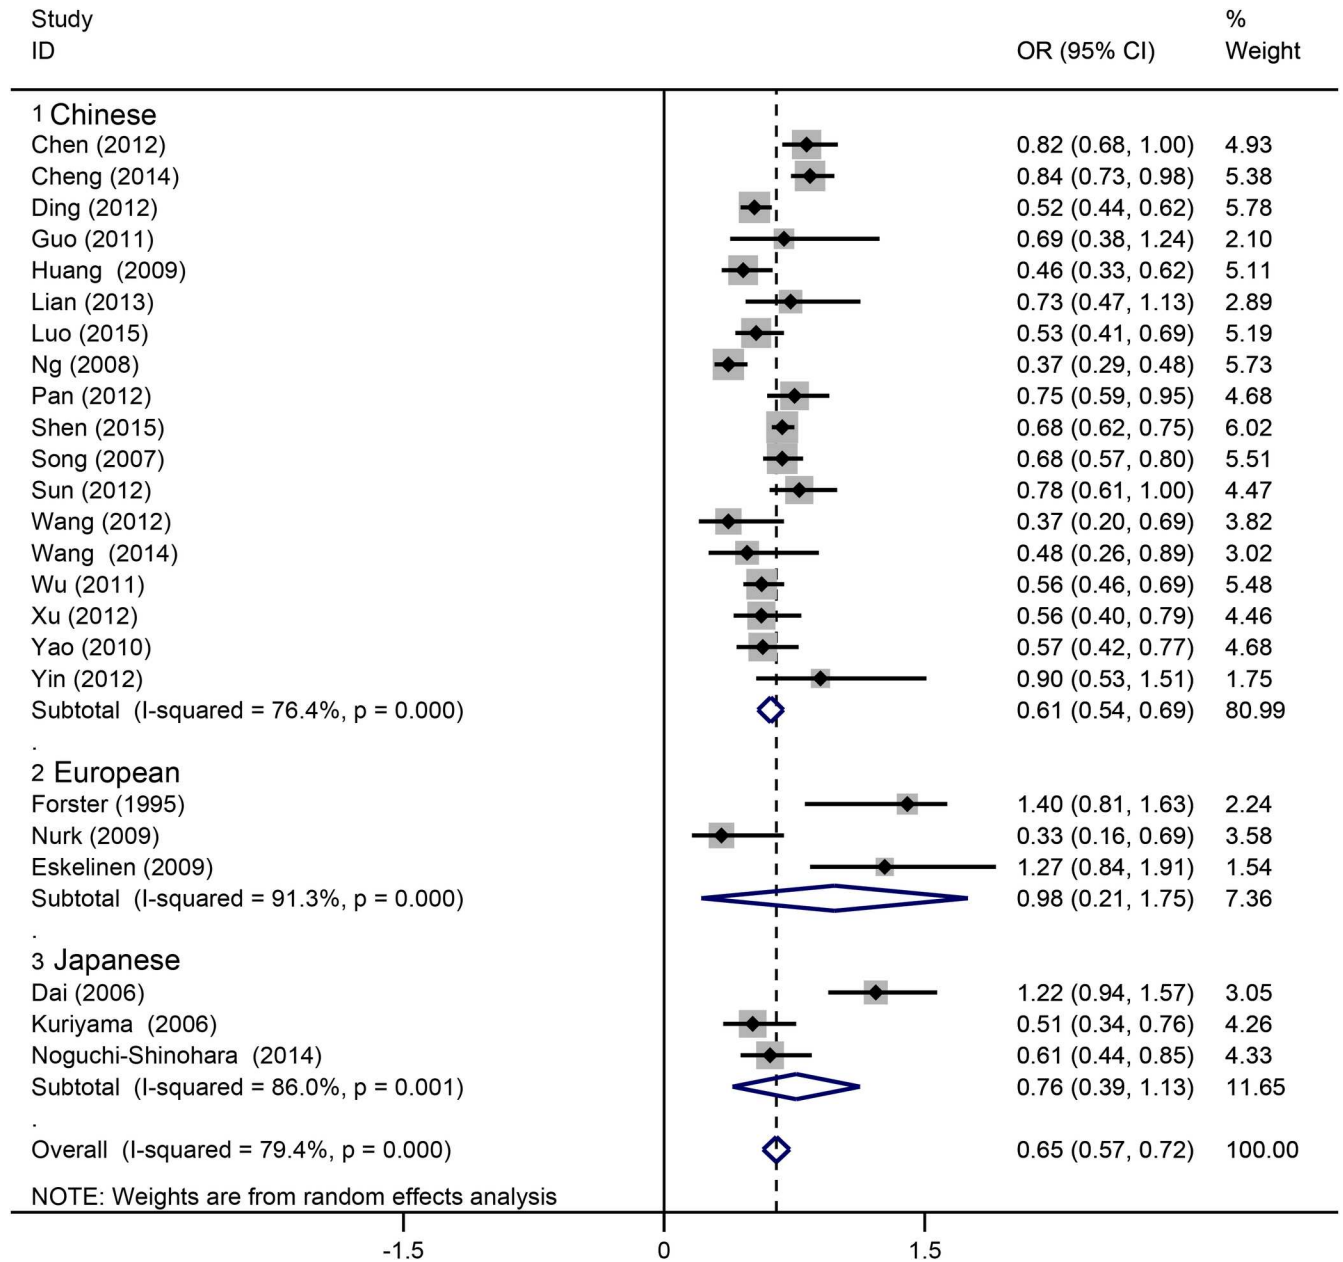

**Fig 4. Subgroup analysis of association between tea intake and the cognitive disorders based on population.**

doi:10.1371/journal.pone.0165861.g004

subgroup analysis in terms of outcomes which showed no association between tea intake and AD. A Japanese study [25] showed an obvious association between tea intake and MCI, but no obvious association was found in the outcome of AD (Fig 6). Nonetheless, we cannot draw a conclusion that there has no association between tea drinking and AD, because of lack of included studies, especially lack of non-Chinese studies. As well, the larger sample sizes in CoI studies than AD studies would influence the pooled result (Table 1). In addition to the above reasons, the origin of the studies, the locations/regions of studied populations and the sample size would also affect the results of the pooled analyses. Except for tea drink frequency, the intake duration is also an important factor influencing the overall pooled result. However, only

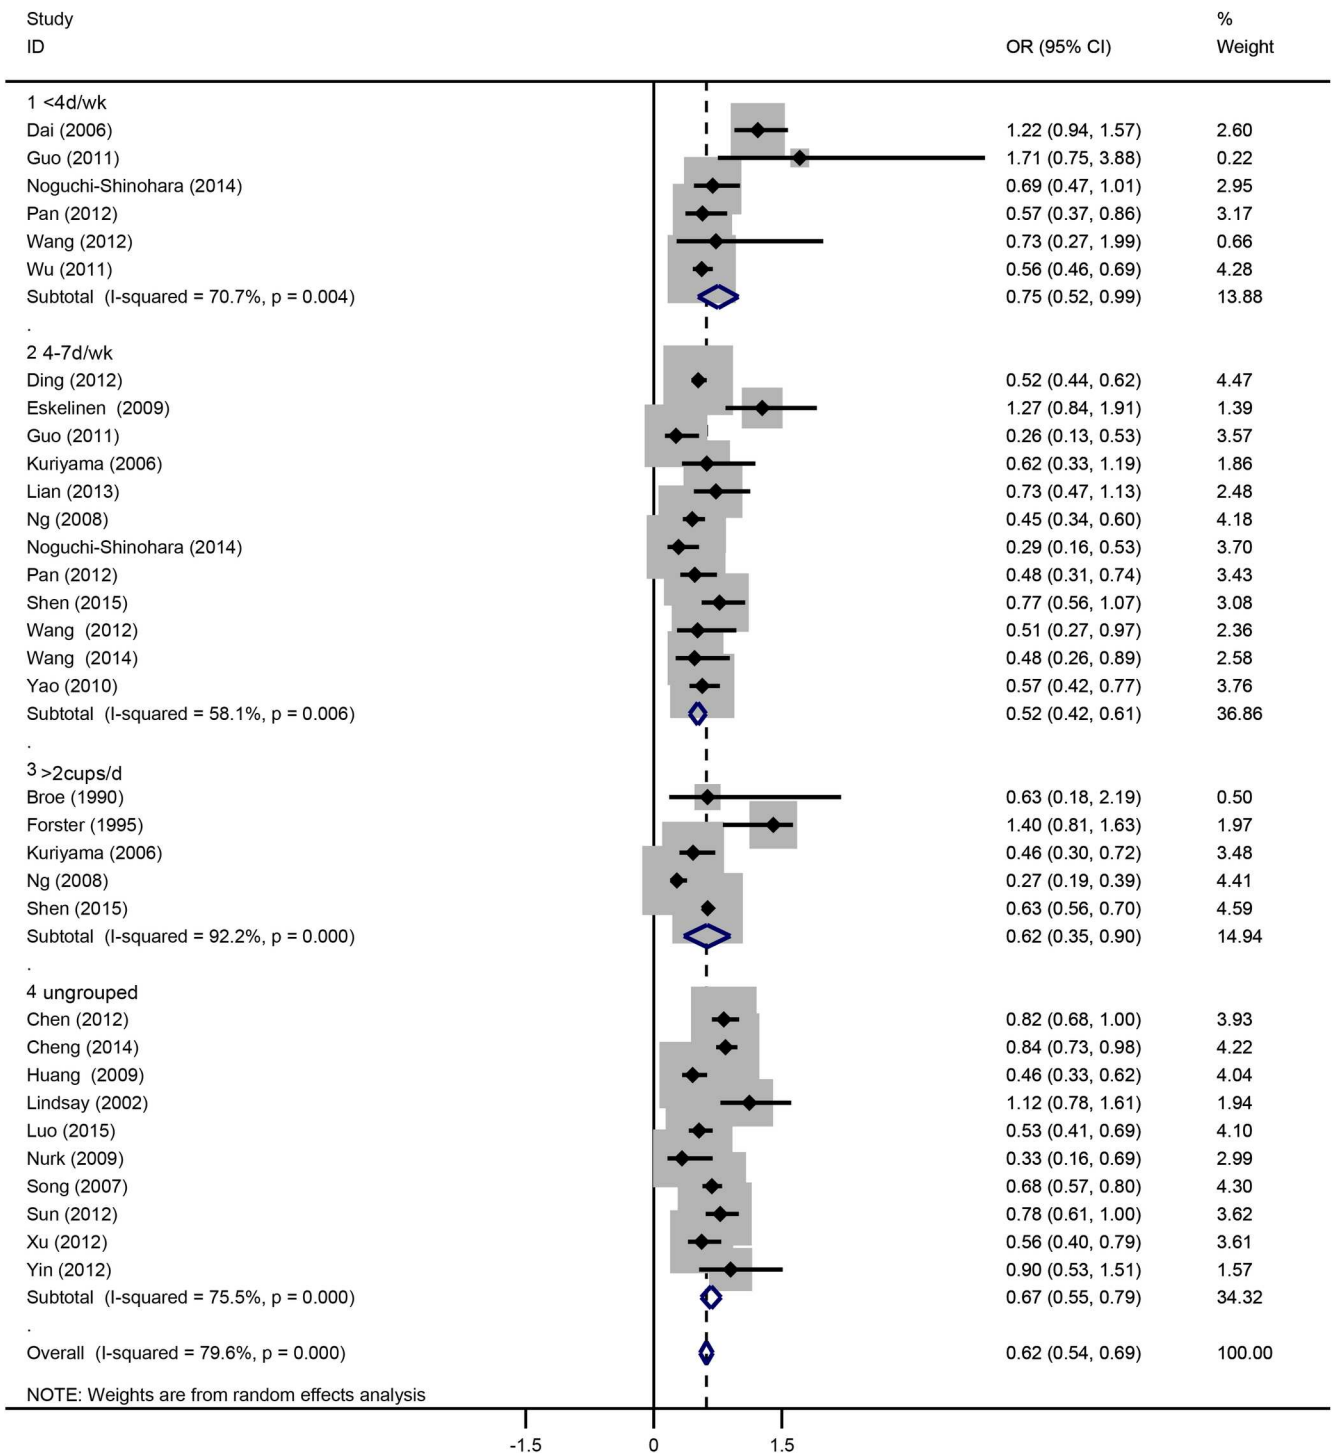

**Fig 5. Subgroup analysis of association between tea intake and the cognitive disorders based on tea drinking frequency.** Ungrouped means studies without information on drinking frequency.

doi:10.1371/journal.pone.0165861.g005

one study [21] considered the tea intake duration, and drinking tea more than 10 years did not decrease the risk of AD compared to the people drinking less than 10 years (OR = 0.43, 95% CI = 0.17–1.05). This result should be confirmed by larger sample studies in future. It also



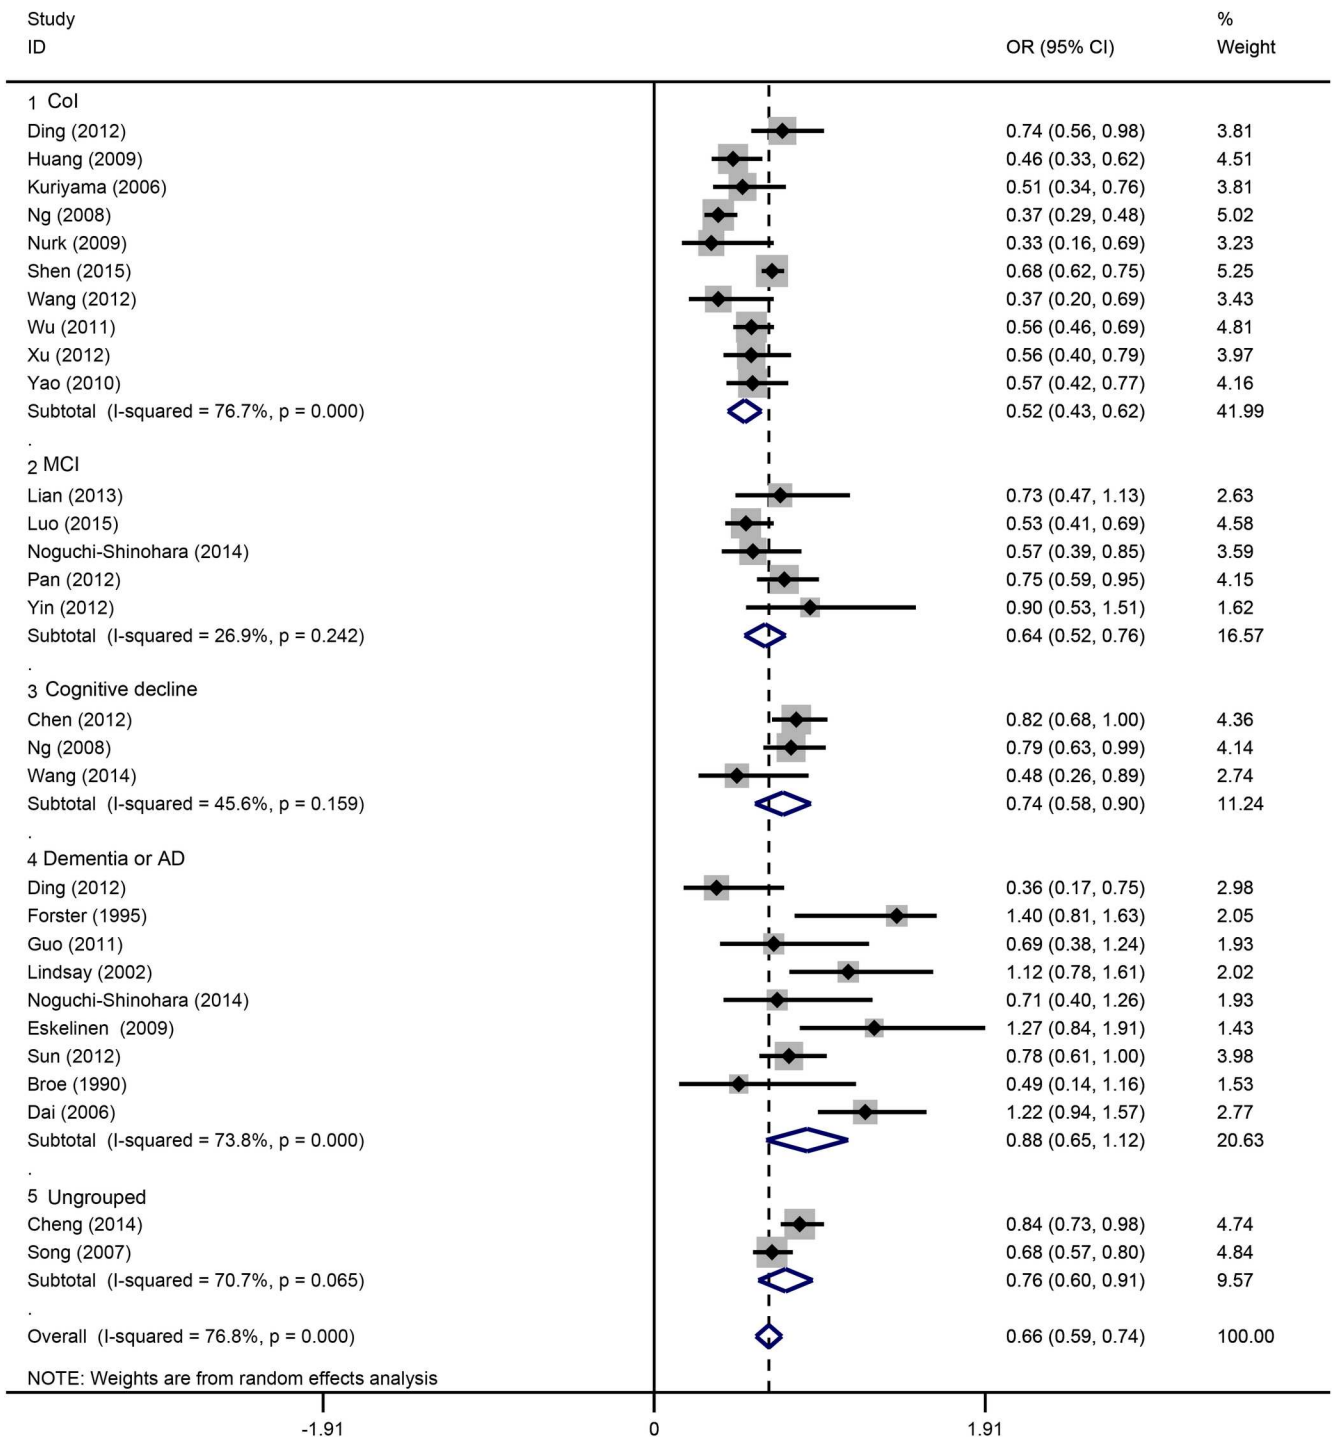

**Fig 6. Subgroup analysis of association between tea intake and the cognitive disorders based on type of cognitive disorders.**

doi:10.1371/journal.pone.0165861.g006

reminds the researchers considering the effect of tea intake duration in further experiment design.

Our meta-analysis has strengths, such as no publication bias. Publication bias is an important factor influencing the quality and reliability of meta-analysis. In this meta-analysis,

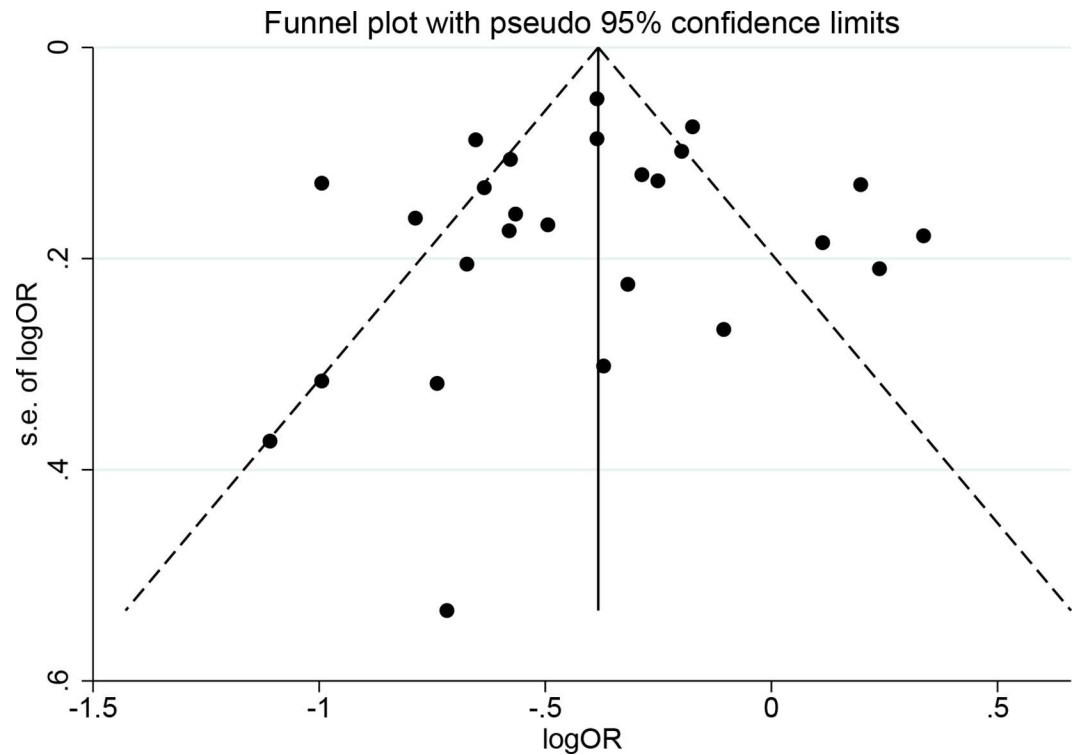

**Fig 7. Funnel plot for assessment of publication bias.**

doi:10.1371/journal.pone.0165861.g007

symmetric distribution of the included studies would improve the reliability of the statistical analysis to an extent. Subgroup analyses could evaluate the effect of the study design, population, drinking frequency and different cognitive disorders on the overall pooled result. In addition, our meta-analysis included more Chinese studies than the previous one [13]. Tea drinkers may be easier to find in Chinese people.

Nevertheless, this meta-analysis has several limitations. Firstly, there were no double-blind placebo controlled trials regarding this topic. All of the included studies were observational studies. Also, some confounders were not adjusted in the original studies. Therefore, the confounders would cause bias in our pooled results. Secondly, it is difficult to ensure the tea drink frequency and volume of the participants. Some included studies did not classify the tea drinkers by drink frequency and volume. The cognitive protective effects of tea are usually dose dependent. If the tea drink history of the participants was unclear, the pooled analysis would be neutralized. Thirdly, different diagnostic criteria were used in the original studies. Finally, significant heterogeneity was found in our meta-analysis. One of the major causes might be the various cut-off value of MMSE (range from 10 to 26) for CoI diagnosis. Besides, female and older population may have a higher risk of cognitive disorders [47]. Thus, some other potential confounders like age, gender and lifestyles may partially contribute to the heterogeneity.

In conclusion, we meta-analyzed 26 observational studies and found that daily tea drinking could decrease the risk of CoI, MCI and cognitive decline in elderly. However, no association was found between tea intake and AD. Further studies are needed to confirm our findings.

## Supporting Information

**S1 File. The PRISMA Checklist.**  
(DOC)



**S2 File. The reasons for exclusion of the 42 full-text reviewed studies.**  
(PDF)

## Acknowledgments

We are very grateful for the invaluable paper revision by Dr. Wenzheng Zhang, an associate professor in the Center of Cell Biology and Cancer Research in Albany Medical College.

## Author Contributions

**Conceptualization:** QPM.

**Data curation:** CH.

**Formal analysis:** CH QYC DJY.

**Funding acquisition:** XHL.

**Investigation:** QPM DJY.

**Methodology:** QPM CH.

**Project administration:** XC.

**Resources:** KS.

**Software:** KS.

**Supervision:** XHL.

**Validation:** QPM QYC.

**Visualization:** XC.

**Writing – original draft:** QPM.

**Writing – review & editing:** XC XHL.

## References

1. Huang C-C, Liu M-E, Kao H-W, Chou K-H, Yang AC, Wang Y-H, et al. (2016) Effect of Alzheimer's Disease Risk Variant rs3824968 at SORL1 on Regional Gray Matter Volume and Age-Related Interaction in Adult Lifespan. *Sci Rep* 6.
2. Bishnoi RJ, Palmer RF, Royall DR (2015) Serum Interleukin (IL)-15 as a Biomarker of Alzheimer's Disease. *PLoS ONE* 10: e0117282. doi: [10.1371/journal.pone.0117282](https://doi.org/10.1371/journal.pone.0117282) PMID: [25710473](https://pubmed.ncbi.nlm.nih.gov/25710473/)
3. Di Marco LY, Marzo A, Munoz-Ruiz M, Ikram MA, Kivipelto M, Ruefenacht D, et al. (2014) Modifiable lifestyle factors in dementia: a systematic review of longitudinal observational cohort studies. *J Alzheimers Dis* 42: 119–135. doi: [10.3233/JAD-132225](https://doi.org/10.3233/JAD-132225) PMID: [24799342](https://pubmed.ncbi.nlm.nih.gov/24799342/)
4. Graham LC, Harder JM, Soto I, de Vries WN, John SW, Howell GR (2016) Chronic consumption of a western diet induces robust glial activation in aging mice and in a mouse model of Alzheimer's disease. *Sci Rep* 6.
5. Durga J, Van Boxtel MP, Schouten EG, Kok FJ, Jolles J, Katan MB, et al. (2007) Effect of 3-year folic acid supplementation on cognitive function in older adults in the FACIT trial: a randomised, double blind, controlled trial. *The Lancet* 369: 208–216.
6. Nurk E, Refsum H, Drevon CA, Tell GS, Nygaard HA, Engedal K, et al. (2009) Intake of flavonoid-rich wine, tea, and chocolate by elderly men and women is associated with better cognitive test performance. *J Nutr* 139: 120–127. doi: [10.3945/jn.108.095182](https://doi.org/10.3945/jn.108.095182) PMID: [19056649](https://pubmed.ncbi.nlm.nih.gov/19056649/)
7. Panza F, Solfrizzi V, Barulli MR, Bonfiglio C, Guerra V, Osella A, et al. (2015) Coffee, tea, and caffeine consumption and prevention of late-life cognitive decline and dementia: a systematic review. *J Nutr Health Aging* 19: 313–328. doi: [10.1007/s12603-014-0563-8](https://doi.org/10.1007/s12603-014-0563-8) PMID: [25732217](https://pubmed.ncbi.nlm.nih.gov/25732217/)

8. Pan C-W, Wang X, Ma Q, Sun H-P, Xu Y, Wang P (2015) Cognitive dysfunction and health-related quality of life among older Chinese. *Sci Rep* 5.
9. Kuriyama S, Hozawa A, Ohmori K, Shimazu T, Matsui T, Ebihara S, et al. (2006) Green tea consumption and cognitive function: a cross-sectional study from the Tsurugaya Project 1. *Am J Clin Nutr* 83: 355–361. PMID: [16469995](#)
10. Ide K, Yamada H, Takuma N, Park M, Wakamiya N, Nakase J, et al. (2014) Green tea consumption affects cognitive dysfunction in the elderly: a pilot study. *Nutrients* 6: 4032–4042. doi: [10.3390/nu6104032](#) PMID: [25268837](#)
11. Forster DP, Newens AJ, Kay DW, Edwardson JA (1995) Risk factors in clinically diagnosed presenile dementia of the Alzheimer type: a case-control study in northern England. *J Epidemiol Community Health* 49: 253–258. PMID: [7629459](#)
12. Lindsay J, Laurin D, Verreault R, Hébert R, Helliwell B, Hill GB, et al. (2002) Risk factors for Alzheimer's disease: a prospective analysis from the Canadian Study of Health and Aging. *Am J Epidemiol* 156: 445–453. PMID: [12196314](#)
13. Kim YS, Kwak SM, Myung SK (2015) Caffeine intake from coffee or tea and cognitive disorders: a meta-analysis of observational studies. *Neuroepidemiology* 44: 51–63. doi: [10.1159/000371710](#) PMID: [25721193](#)
14. Crichton GE, Bryan J, Murphy KJ (2013) Dietary antioxidants, cognitive function and dementia—a systematic review. *Plant Foods Hum Nutr* 68: 279–292. doi: [10.1007/s11130-013-0370-0](#) PMID: [23881465](#)
15. Moher D, Liberati A, Tetzlaff J, Altman DG, The PG (2009) Preferred Reporting Items for Systematic Reviews and Meta-Analyses: The PRISMA Statement. *PLoS Med* 6: e1000097. doi: [10.1371/journal.pmed.1000097](#) PMID: [19621072](#)
16. Wells G, Shea B, O'connell D, Peterson J, Welch V, Losos M, et al. (2014) The Newcastle-Ottawa Scale (NOS) for assessing the quality of nonrandomised studies in meta-analyses. URL: [http://www.ohrica.com/clinical\\_epidemiology/oxford.asp](http://www.ohrica.com/clinical_epidemiology/oxford.asp).
17. Huedo-Medina TB, Sánchez-Meca J, Marín-Martínez F, Botella J (2006) Assessing heterogeneity in meta-analysis: Q statistic or I<sup>2</sup> index? *Psychological methods* 11: 193. doi: [10.1037/1082-989X.11.2.193](#) PMID: [16784338](#)
18. Chen X, Huang Y, Cheng HG (2012) Lower intake of vegetables and legumes associated with cognitive decline among illiterate elderly Chinese: a 3-year cohort study. *J Nutr Health Aging* 16: 549–552. PMID: [22659995](#)
19. Cheng J, Xu N-N, Ma Y-X, Wei X, Li X-Y (2014) Epidemiological investigation and risk factors analysis of Alzheimer's disease and cognitive impairment in Beijing. *J Ningxia Medical University* 36: 320–323.
20. Ding D (2012) Population-based prevalence survey and genetic epidemiology of cognitive impairment among elderly: Fudan University.
21. Guo Z-J, Yu H-Q, Xing A, Ma H-W, Zhang Z, Jia X-J, et al. (2011) Lifestyle factors and the risk of Alzheimer's disease. *Chin J Gerontol* 31: 3228–3230.
22. Lian GM, Zhu WB, Zhou D (2013) Correlation between Lifestyle Factors and Mild Cognitive Impairment in Old Adults. *Chin J Rehabil Theory Practice* 19: 465–468.
23. Luo X, Tang M-N, Shen Y, Jun-Chang Y, Huang R-Y, Ren J-J, et al. (2015) Risk factors for mild cognitive impairment in community residents. *Chin J Geriatric Heart Brain Vessel Dis* 17: 227–230.
24. Ng TP, Feng L, Niti M, Kua EH, Yap KB (2008) Tea consumption and cognitive impairment and decline in older Chinese adults. *Am J Clin Nutr* 88: 224–231. PMID: [18614745](#)
25. Noguchi-Shinohara M, Yuki S, Dohmoto C, Ikeda Y, Samuraki M, Iwasa K, et al. (2014) Consumption of green tea, but not black tea or coffee, is associated with reduced risk of cognitive decline. *PLoS One* 9: e96013. doi: [10.1371/journal.pone.0096013](#) PMID: [24828424](#)
26. Pan HY, Wang JQ, Mei-Ling WU, Chen JY (2012) Study on prevalence rate and quality of life of elderly patients with mild cognitive impairment in community. *Nursing J Chin Peoples Liberation Army* 29: 7–9.
27. Song F, Liu J-L, Gao H, Zhao Z-H (2007) Epidemiological investigation and risk factor analysis of senile dementia and cognitive disorder in veteran cadres in Northwest China. *J Fourth Military Med University* 6: 500–502.
28. Wang H-Y, Zhang X-Q, Meng C, Sun H-L, Sun L, Wang H, et al. (2012) Vascular cognitive impairment and tea drinking: a case-control study. *Chin J Multi Org Dis In Elderly* 11: 256–260.
29. XU X-H (2012) Study of prevalence and associated factors of cognitive impairment among elderly population in Shanghai urban area: Shanghai Jiaotong University.

30. Yin LY, Cui ZJ, Yang HX, Guo ZW, Shao CH (2012) Investigation on mild cognitive impairment. *Clinical Focus* 27: 2032–2035.
31. Shen W, Xiao Y, Ying X, Li S, Zhai Y, Shang X, et al. (2015) Tea Consumption and Cognitive Impairment: A Cross-Sectional Study among Chinese Elderly. *PLoS One* 10: e0137781. doi: [10.1371/journal.pone.0137781](https://doi.org/10.1371/journal.pone.0137781) PMID: [26359663](https://pubmed.ncbi.nlm.nih.gov/26359663/)
32. Broe G, Henderson A, Creasey Haa, McCusker E, Korten A, Jorm A, et al. (1990) A case-control study of Alzheimer's disease in Australia. *Neurology* 40: 1698–1698. PMID: [2146525](https://pubmed.ncbi.nlm.nih.gov/2146525/)
33. Sun H (2012) Prevalence of dementia among elderly people and associated factors in Sheshan Town, Songjiang District, Shanghai: Shanghai Jiaotong University.
34. Huang C-Q, Dong B-R, Zhang Y-L, Wu H-M, Liu Q-X (2009) Association of cognitive impairment with smoking, alcohol consumption, tea consumption, and exercise among Chinese nonagenarians/centenarians. *Cogn Behav Neurol* 22: 190–196. doi: [10.1097/WNN.0b013e3181b2790b](https://doi.org/10.1097/WNN.0b013e3181b2790b) PMID: [19741330](https://pubmed.ncbi.nlm.nih.gov/19741330/)
35. Dai Q, Borenstein AR, Wu Y, Jackson JC, Larson EB (2006) Fruit and vegetable juices and Alzheimer's disease: the Kame Project. *Am J Med* 119: 751–759. doi: [10.1016/j.amjmed.2006.03.045](https://doi.org/10.1016/j.amjmed.2006.03.045) PMID: [16945610](https://pubmed.ncbi.nlm.nih.gov/16945610/)
36. Wang G, Tang H-D, Zhuang J-P, Xu X-H, Liu L-H, Li B, et al. (2014) Risk factors for cognitive decline in elderly people: findings from the two-year follow-up study in Shanghai urban community. *J Alzheimers Dis* 39: 891–897. doi: [10.3233/JAD-131514](https://doi.org/10.3233/JAD-131514) PMID: [24321891](https://pubmed.ncbi.nlm.nih.gov/24321891/)
37. Wu M-S, Lan T-H, Chen C-M, Chiu H-C, Lan T-Y (2011) Socio-demographic and health-related factors associated with cognitive impairment in the elderly in Taiwan. *BMC Public Health* 11: 1.
38. Eskelinen MH, Ngandu T, Tuomilehto J, Soininen H, Kivipelto M (2009) Midlife coffee and tea drinking and the risk of late-life dementia: a population-based CAIDE study. *J Alzheimers Dis* 16: 85–91. doi: [10.3233/JAD-2009-0920](https://doi.org/10.3233/JAD-2009-0920) PMID: [19158424](https://pubmed.ncbi.nlm.nih.gov/19158424/)
39. Yao Y-H, Xu R-F, Tang H-D, Jiang G-X, Wang Y, Wang G, et al. (2010) Cognitive impairment and associated factors among the elderly in the Shanghai suburb: findings from a low-education population. *Neuroepidemiology* 34: 245–252. doi: [10.1159/000297751](https://doi.org/10.1159/000297751) PMID: [20299806](https://pubmed.ncbi.nlm.nih.gov/20299806/)
40. Arendash GW, Mori T, Cao C, Mamcarz M, Runfeldt M, Dickson A, et al. (2009) Caffeine reverses cognitive impairment and decreases brain amyloid- $\beta$  levels in aged Alzheimer's disease mice. *J Alzheimers Dis* 17: 661–680. doi: [10.3233/JAD-2009-1087](https://doi.org/10.3233/JAD-2009-1087) PMID: [19581722](https://pubmed.ncbi.nlm.nih.gov/19581722/)
41. Henning SM, Fajardo-Lira C, Lee HW, Youssefian AA, Go VL, Heber D (2003) Catechin content of 18 teas and a green tea extract supplement correlates with the antioxidant capacity. *Nutr Cancer* 45: 226–235. doi: [10.1207/S15327914NC4502\\_13](https://doi.org/10.1207/S15327914NC4502_13) PMID: [12881018](https://pubmed.ncbi.nlm.nih.gov/12881018/)
42. Seeram NP, Henning SM, Niu Y, Lee R, Scheuller HS, Heber D (2006) Catechin and caffeine content of green tea dietary supplements and correlation with antioxidant capacity. *J Agr Food Chem* 54: 1599–1603.
43. Mandel S, Weinreb O, Amit T, Youdim MBH (2004) Cell signaling pathways in the neuroprotective actions of the green tea polyphenol (-)-epigallocatechin-3-gallate: implications for neurodegenerative diseases. *J Neurochem* 88: 1555–1569. PMID: [15009657](https://pubmed.ncbi.nlm.nih.gov/15009657/)
44. Baluchnejadmojarad T, Roghani M (2011) Chronic epigallocatechin-3-gallate ameliorates learning and memory deficits in diabetic rats via modulation of nitric oxide and oxidative stress. *Behav Brain Res* 224: 305–310. doi: [10.1016/j.bbr.2011.06.007](https://doi.org/10.1016/j.bbr.2011.06.007) PMID: [21699923](https://pubmed.ncbi.nlm.nih.gov/21699923/)
45. Rezai-Zadeh K, Shytle D, Sun N, Mori T, Hou H, Jeanniton D, et al. (2005) Green tea epigallocatechin-3-gallate (EGCG) modulates amyloid precursor protein cleavage and reduces cerebral amyloidosis in Alzheimer transgenic mice. *J Neurosci* 25: 8807–8814. doi: [10.1523/JNEUROSCI.1521-05.2005](https://doi.org/10.1523/JNEUROSCI.1521-05.2005) PMID: [16177050](https://pubmed.ncbi.nlm.nih.gov/16177050/)
46. Khokhar S, Magnusdottir SGM (2002) Total Phenol, Catechin, and Caffeine Contents of Teas Commonly Consumed in the United Kingdom. *J Agr Food Chem* 50: 565–570.
47. Shimada H, Makizako H, Doi T, Yoshida D, Tsutsumimoto K, Anan Y, et al. (2013) Combined prevalence of frailty and mild cognitive impairment in a population of elderly Japanese people. *J Am Med Assoc* 14: 518–524.
48. Huang CQ, Dong BR, Zhang YL, Wu HM, Liu QX (2009) Association of cognitive impairment with smoking, alcohol consumption, tea consumption, and exercise among Chinese nonagenarians/centenarians. *Cogn Behav Neurol* 22: 190–196. doi: [10.1097/WNN.0b013e3181b2790b](https://doi.org/10.1097/WNN.0b013e3181b2790b) PMID: [19741330](https://pubmed.ncbi.nlm.nih.gov/19741330/)
